# Supplementary material
Source: PubMed Central journal article supplement (PMC7196485)
Supplement: NIHMS1577191-supplement-1.pdf [file NIHMS1577191-supplement-1.pdf]

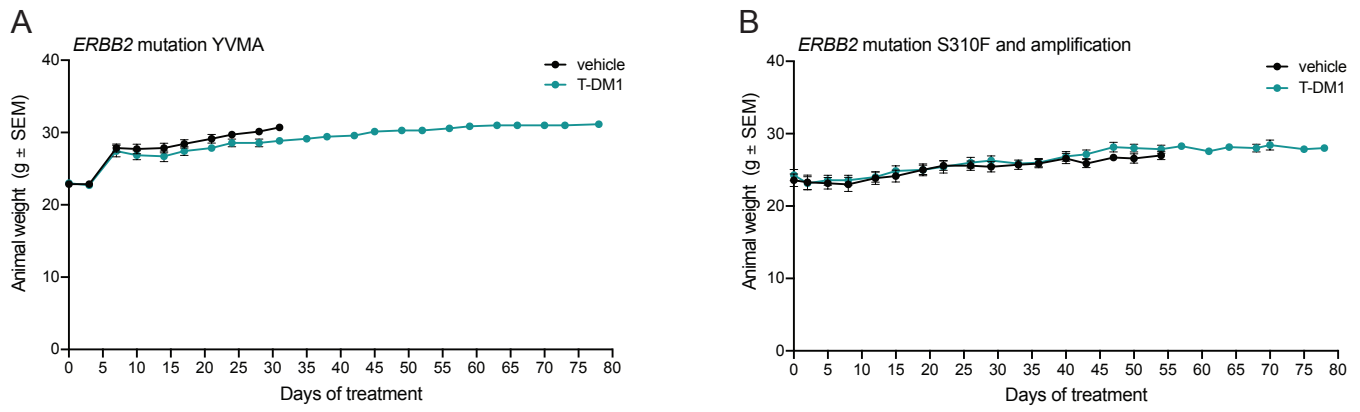

**Supplementary Figure 1: T-DM1 prolonged therapy is tolerable in mice.**

(A, B) Animal body weight of mice shown in Figure 1D (A) and 1E (B). Measurements show average body weight  $\pm$  SEM, n=7 animals per group.
