# Supplementary material
Source: PubMed Central journal article supplement (PMC7196485)
Supplement: NIHMS1577191-supplement-4.pdf [file NIHMS1577191-supplement-4.pdf]

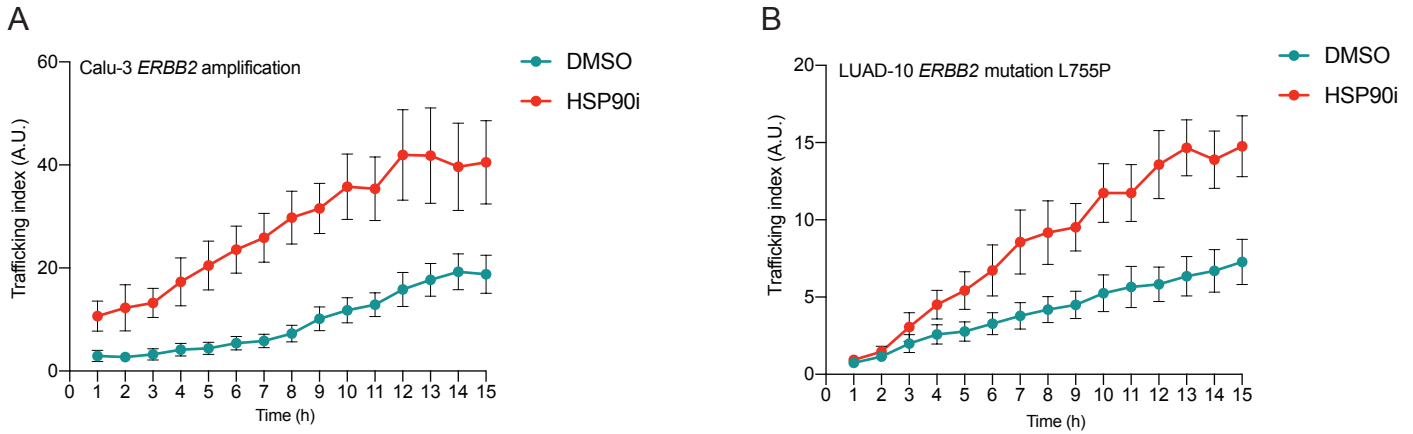

**Supplementary Figure 4: HSP90 inhibition increase T-DM1 internalization in both ERBB2 amplified and mutant lung cancer cells.** (A, B) Calu-3, ERBB2-amplified NSCLC cells (A) or LUAD-10 HER2 mutant L755P lung cancer cells (B) were incubated with pHrodo-T-DM1 (1  $\mu$ g/mL) together with the HSP90 inhibitor (200 nM) or DMSO control for 30 minutes at 4°C and then released at 37°C and Z-stack imaged every hour over 15 hours on a confocal microscope. Data are shown as number of normalized pHrodo dots per cell (Trafficking Index) over time. The error bars indicate SEM (n = 2 independent experiments,  $\geq$ 80 cells analyzed in total per condition, per time point).
