# Supplementary material
Source: PubMed Central journal article supplement (PMC7196485)
Supplement: NIHMS1577191-supplement-5.pdf [file NIHMS1577191-supplement-5.pdf]

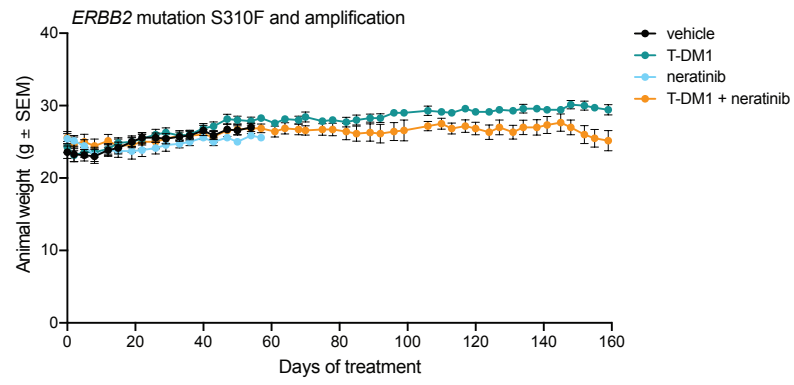

**Supplementary Figure 5: The combination of neratinib and T-DM1 is tolerable in mice.** Animal body weight of mice shown in Figure 3E. Measurements show average body weight  $\pm$  SEM, n=7 animals per group.
