# Supplementary material
Source: PubMed Central journal article supplement (PMC7196485)
Supplement: NIHMS1577191-supplement-6.pdf [file NIHMS1577191-supplement-6.pdf]

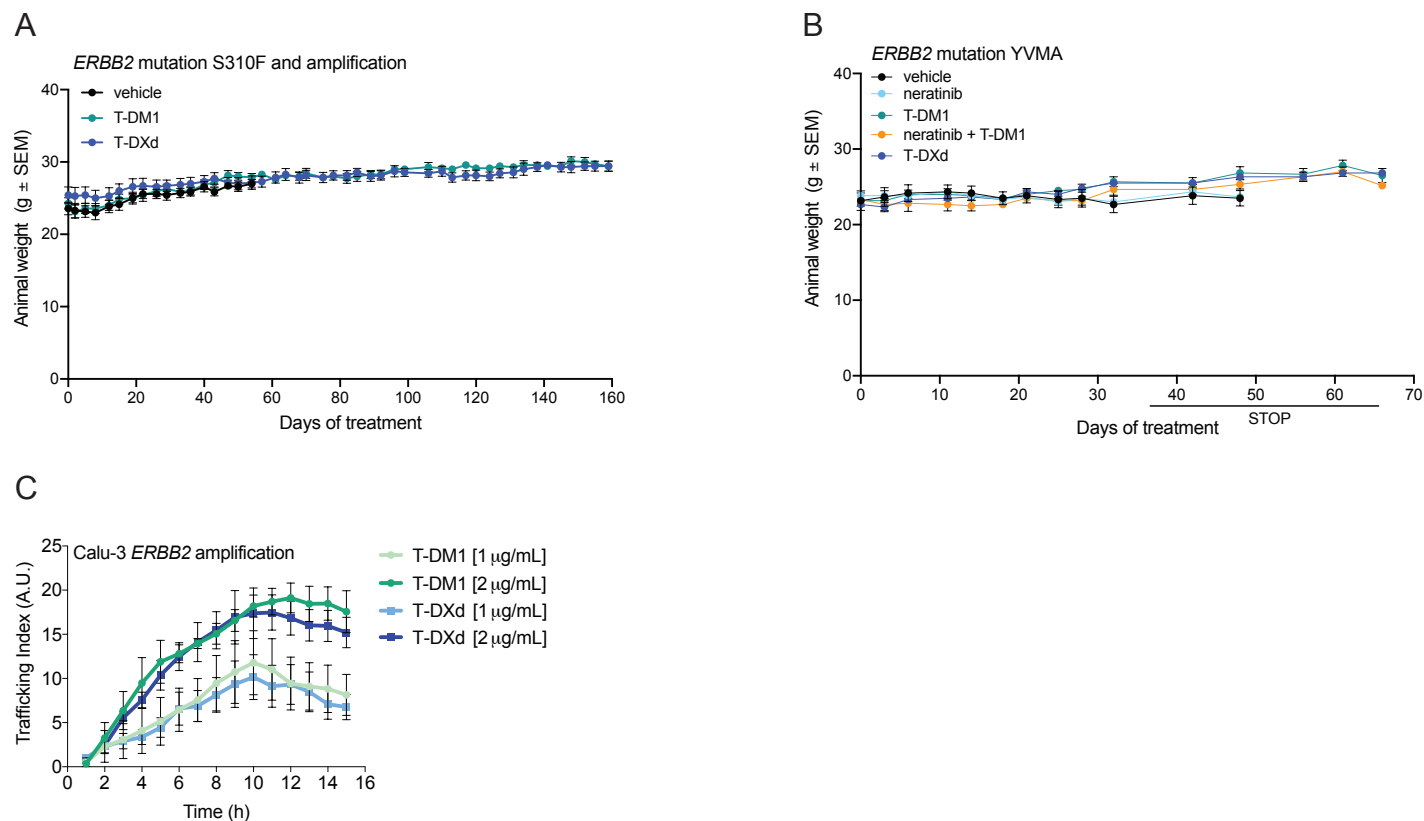

**Supplementary Figure 6: T-DXd is tolerable in mice and has similar internalization kinetics to T-DM1.** (A, B) Animal body weight of mice shown in Figure 4A (A), 4B (B). Measurements show average body weight  $\pm$  SEM, n=7 (A) or n=6 (B) animals per group. (C) Calu-3, *ERBB2*-amplified NSCLC cells, were incubated with two different concentration of pHrodo-T-DM1 (1 or 2  $\mu$ g/mL) in parallel with two different concentration of pHrodo-T-DXd (1 or 2  $\mu$ g/mL) for 30 minutes at 4°C and then released at 37°C and Z-stack imaged every hour over 16 hours on a confocal microscope. Data are shown as number of normalized pHrodo dots per cell (Trafficking Index) over time. The error bars indicate SEM (n = 2 independent experiments,  $\geq$ 80 cells analyzed in total per condition, per time point).
